# Supplementary material for: Psychometric Validation of the Multidimensional Scale of Perceived Social Support During Pregnancy in Rural Pakistan
Source: PubMed Central journal article supplement (PMC8239233; doi:10.3389/fpsyg.2021.601563), 2021-06-15

**Figure 2: Scree plot demonstrating number of Multidimensional scale of perceived social support factors to retain among healthy women and women with depression**

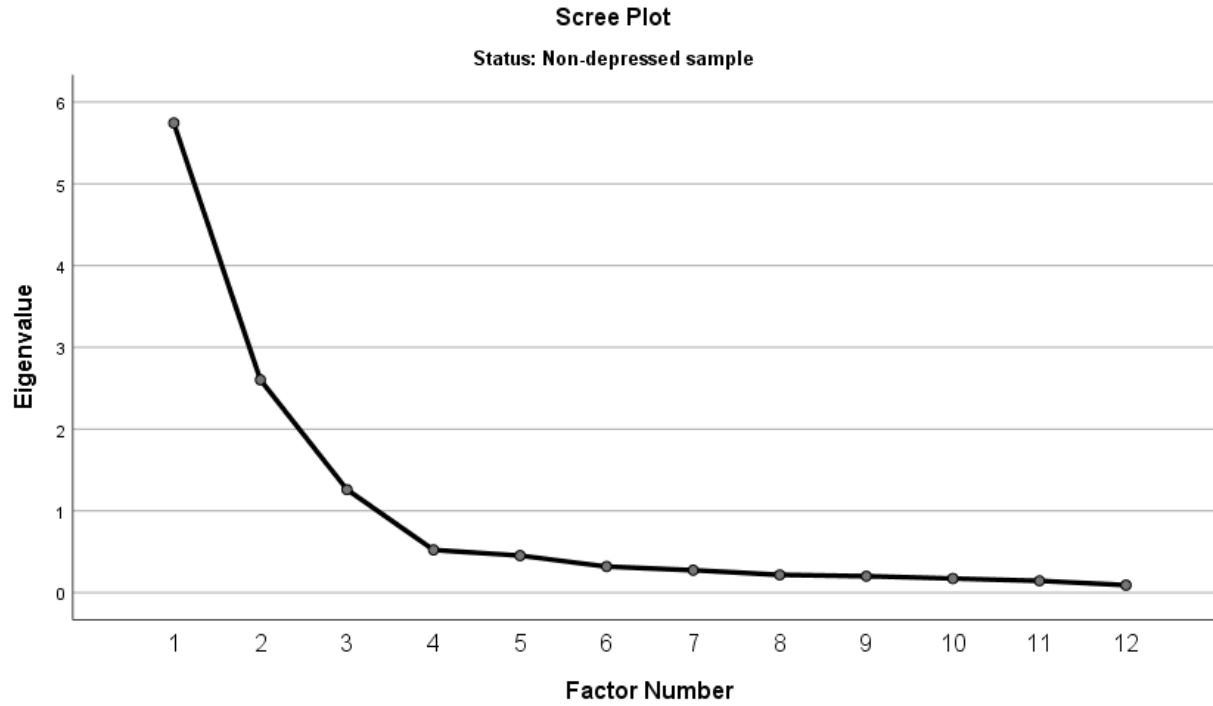

### Scree Plot

Status: Depressed sample

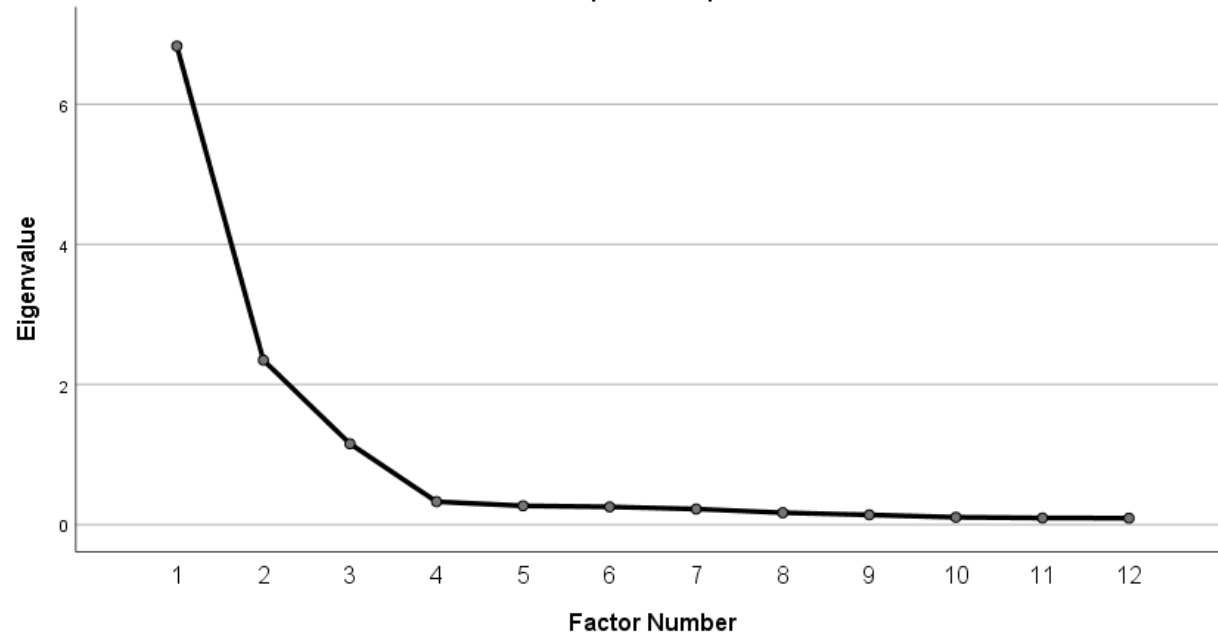

Supplement: Image_2.pdf [file Image_2.pdf]
